# Supplementary material
Source: ML conference proceedings conference paper supplement (https://proceedings.neurips.cc/paper_files/paper/2023/hash/a0e66093d7168b40246af1cddc025daa-Abstract.html)
Supplement: Supplementary file 1 [file a0e66093d7168b40246af1cddc025daa-Supplemental-Conference.zip]

Archive with 2 entries (2 files):
- supplementary_hiddenReps_transformers.pdf
- __MACOSX/._supplementary_hiddenReps_transformers.pdf
